# Supplementary material for: Benefit of burosumab in adults with X-linked hypophosphataemia (XLH) is maintained with long-term treatment
Source: PubMed Central journal article supplement — RMD Open. 2023 Feb 28;9(1):e002676. doi: 10.1136/rmdopen-2022-002676 (PMC9980374; doi:10.1136/rmdopen-2022-002676), 2023-02-28
Supplement: rmdopen-2022-002676supp001.pdf [file rmdopen-2022-002676supp001.pdf]

## Supplementary File

**Supplementary Table 1** Outcome assessments in the phase 3 study and open-label extension

| Week                                                                                                                                                                                                                                                                    | Phase 3 Study |     |     |     |     |     |     | Open-label extension |     |     |     |     |
|-------------------------------------------------------------------------------------------------------------------------------------------------------------------------------------------------------------------------------------------------------------------------|---------------|-----|-----|-----|-----|-----|-----|----------------------|-----|-----|-----|-----|
|                                                                                                                                                                                                                                                                         | BL            | 12a | 24a | 36a | 48a | 72a | 96a | 0b                   | 12b | 24b | 36b | 48b |
| <i>Clinical laboratory tests of efficacy</i>                                                                                                                                                                                                                            |               |     |     |     |     |     |     |                      |     |     |     |     |
| Fasting serum phosphate                                                                                                                                                                                                                                                 | X             | X   | X   | X   | X   | X   | X   | X                    | X   | X   | X   | X   |
| Phosphate reabsorption (TmP/GFR)                                                                                                                                                                                                                                        | X             | X   | X   |     | X   | X   | X   | X                    | X   | X   | X   | X   |
| Serum 1,25 dihydroxyvitamin D                                                                                                                                                                                                                                           | X             |     |     |     | X   | X   | X   | X                    | X   | X   | X   | X   |
| <i>Patient-reported outcomes</i>                                                                                                                                                                                                                                        |               |     |     |     |     |     |     |                      |     |     |     |     |
| WOMAC                                                                                                                                                                                                                                                                   | X             | X   | X   | X   | X   | X   | X   | X                    | X   | X   | X   | X   |
| BPI-SF                                                                                                                                                                                                                                                                  | X             | X   | X   | X   | X   | X   | X   | X                    | X   | X   | X   | X   |
| BFI                                                                                                                                                                                                                                                                     | X             | X   | X   | X   | X   | X   | X   | X                    | X   | X   | X   | X   |
| <i>Ambulatory function</i>                                                                                                                                                                                                                                              |               |     |     |     |     |     |     |                      |     |     |     |     |
| 6MWT                                                                                                                                                                                                                                                                    | X             | X   | X   | X   | X   | X   | X   | X                    | X   | X   | X   | X   |
| <i>Pain medication use (participant diaries)</i>                                                                                                                                                                                                                        |               |     |     |     |     |     |     |                      |     |     |     |     |
|                                                                                                                                                                                                                                                                         | X             | X   | X   | X   | X   |     |     | X                    | X   | X   | X   | X   |
| BFI, Brief Fatigue Inventory; BL, baseline; BPI-SF, Brief Pain Inventory short-form; 6MWT, 6-Minute Walk Test; TmP/GFR, ratio of tubular maximum reabsorption rate to glomerular filtration rate; WOMAC, Western Ontario and McMaster Universities Osteoarthritis Index |               |     |     |     |     |     |     |                      |     |     |     |     |

**Supplementary Table 2** Burosumab Dose in the Open-label Extension Study Population (n=31)

| Study                                                                                               | Week             | <i>n</i> | Mean (SD) mg/kg | Range mg/kg |
|-----------------------------------------------------------------------------------------------------|------------------|----------|-----------------|-------------|
| <b>Phase 3 study</b>                                                                                | Baseline         | 15       | 1.0 (0.06)      | 0.9–1.1     |
|                                                                                                     | 12a <sup>a</sup> | 15       | 1.0 (0.07)      | 0.9–1.1     |
|                                                                                                     | 24a              | 31       | 1.0 (0.07)      | 0.8–1.2     |
|                                                                                                     | 36a              | 31       | 1.0 (0.08)      | 0.9–1.2     |
|                                                                                                     | 48a              | 30       | 1.0 (0.09)      | 0.1–1.2     |
|                                                                                                     | 72a              | 30       | 1.0 (0.08)      | 1.8–1.1     |
|                                                                                                     | 96a              | 30       | 1.0 (0.08)      | 0.5–1.1     |
| <b>Open-label extension</b>                                                                         | 0b               | 31       | 1.0 (0.11)      | 0.9–1.5     |
|                                                                                                     | 12b              | 31       | 1.0 (0.11)      | 0.9–1.5     |
|                                                                                                     | 24b              | 31       | 1.0 (0.11)      | 0.9–1.5     |
|                                                                                                     | 36b              | 31       | 1.0 (0.11)      | 0.8–1.5     |
|                                                                                                     | 48b              | 31       | 1.0 (0.14)      | 0.8–1.5     |
| Randomized double-blind treatment period; participants were randomized 1:1 to burosumab or placebo. |                  |          |                 |             |

**Supplementary Table 3** Pain medication use reported in participants' diaries (n=31)

| Study                       | Week     | Any pain medication<br><i>n</i> (%) | Opioid<br><i>n</i> (%) |
|-----------------------------|----------|-------------------------------------|------------------------|
| <b>Phase 3 study</b>        | Baseline | 25 (80.6)                           | 8 (25.8)               |
|                             | 12a      | 22 (71.0)                           | 5 (16.1)               |
|                             | 24a      | 21 (67.7)                           | 6 (19.4)               |
|                             | 36a      | 23 (74.2)                           | 7 (22.6)               |
|                             | 48a      | 21 (67.7)                           | 5 (16.1)               |
| <b>Open-label extension</b> | 0b       | 16 (51.6)                           | 6 (19.4)               |
|                             | 12b      | 8 (25.8)                            | 2 (6.5)                |
|                             | 24b      | 20 (64.5)                           | 7 (22.6)               |
|                             | 36b      | 12 (38.7)                           | 2 (6.5)                |
|                             | 48b      | 15 (48.4)                           | 4 (12.9)               |

Pain medication use was not collected in weeks 72a and 96a.

**Supplementary Figure 1** Treatment and randomization in the phase 3 study and open-label extension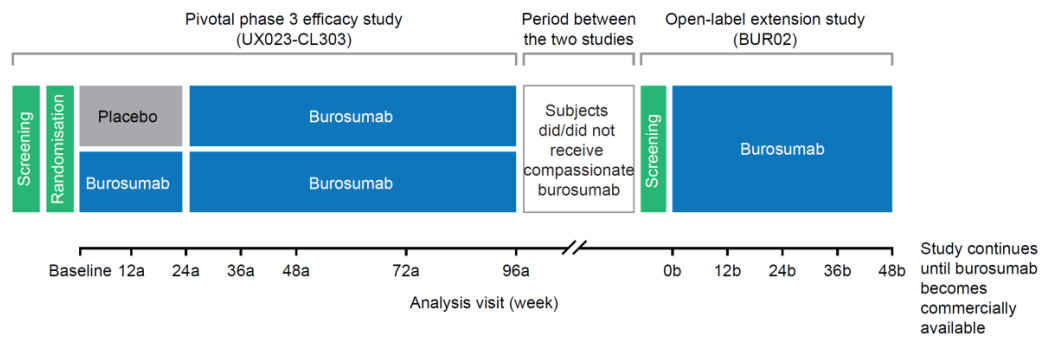

Analysis visits in the phase 3 study and open-label extension study are suffixed a and b, respectively.

The phase 3 efficacy study (UX023-CL303) comprised a 24 week placebo-controlled treatment period (baseline to week 24a) followed by a treatment continuation period during which all participants received open-label burosumab (weeks 24a–96a). Week 0b is the open-label extension study baseline.

**Supplementary Figure 2** Flow of patients through the phase 3 and open label extension studies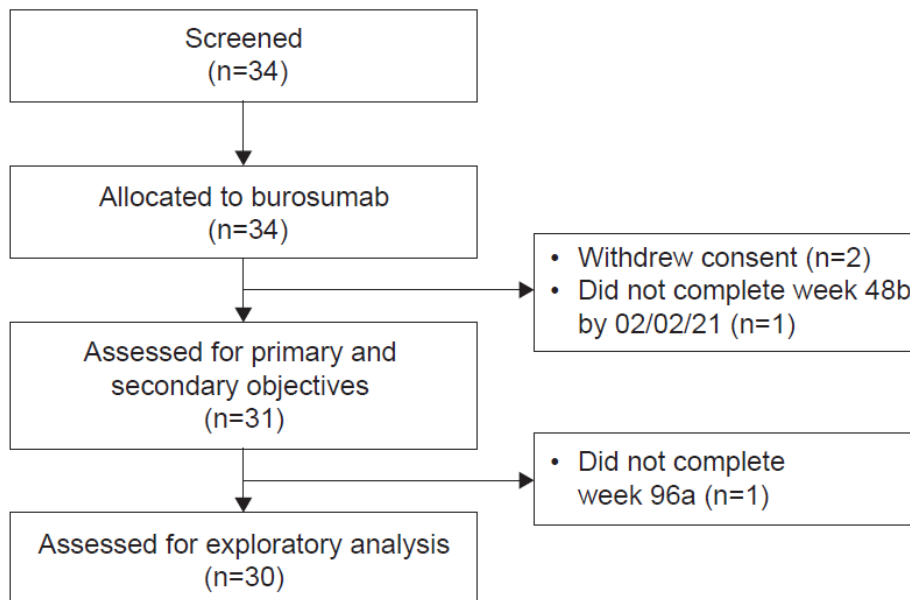

Week 96a is the end of the randomized study; week 48b is the end of the open-label extension.

Supplementary Figure 3 Effect of burosumab maintenance on additional PRO endpoints

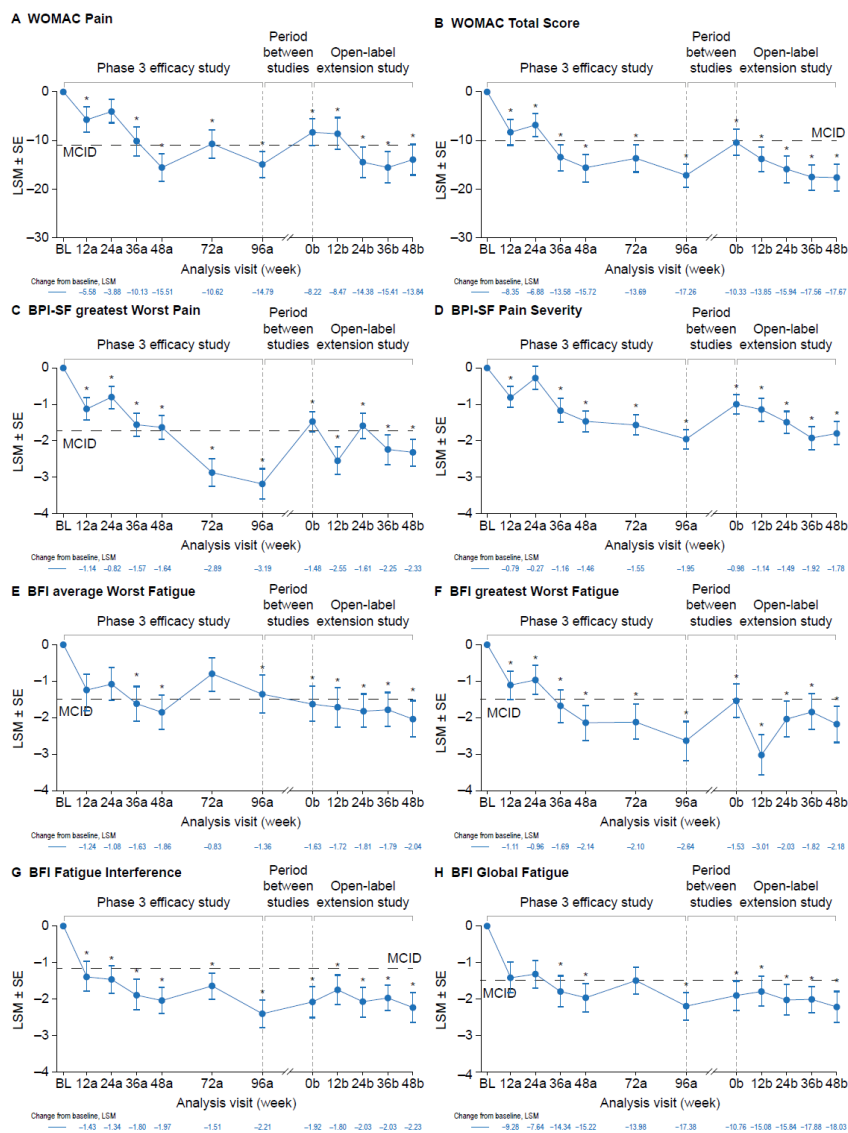

Data available for 31 participants at BL, 28 at week 48b for WOMAC, 27 at week 48b for BPI-SF and BFI. Analysis weeks in the phase 3 study and open-label extension are indicated by 'a' and 'b' suffixes, respectively. A decrease in WOMAC, BPI-SF and BFI score indicates improvement.

BPI-SF and BFI data were captured at a single site visit and were not completed as part of a patient diary at weeks 72a and 96a.

\*  $p < 0.05$  for LSM change from BL (generalized estimating equation repeated-measures analysis).

BFI, Brief Fatigue Inventory; BL, baseline; BPI-SF, Brief Pain Inventory short-form; LSM, least squares mean; MCID, minimum clinically important difference; SE, standard error; WOMAC, Western Ontario and McMaster Universities Osteoarthritis Index.

**Supplementary Figure 4** Effect of burosumab treatment interruption on additional clinical laboratory tests of efficacy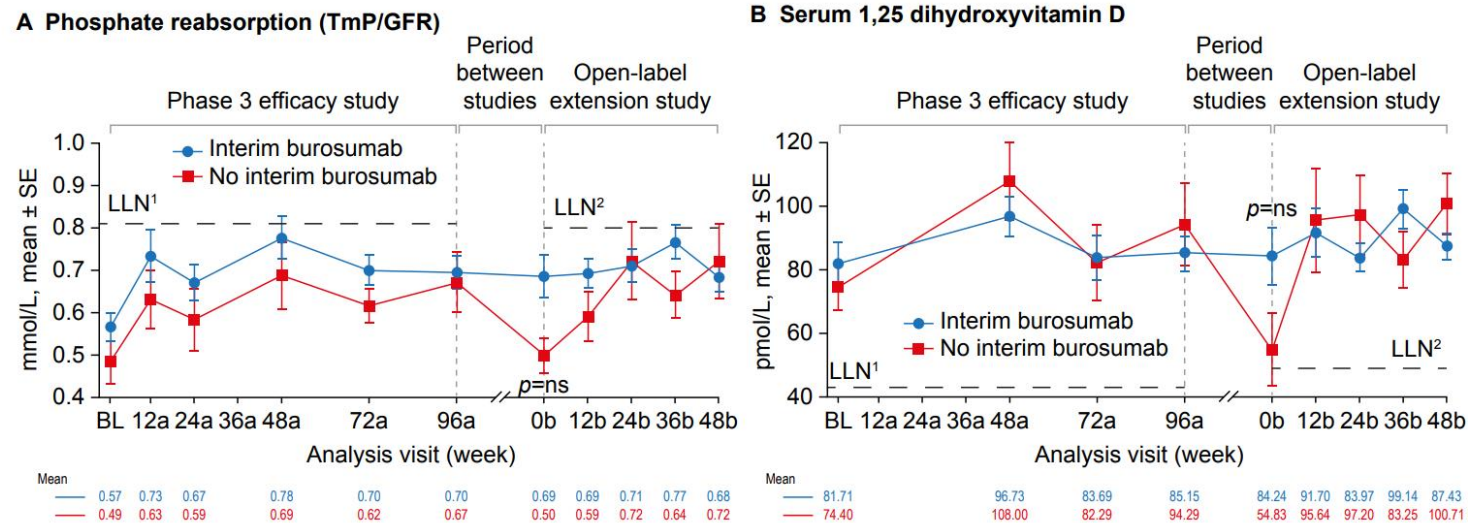

Interim burosumab, n=23; no interim burosumab, n=7

Analysis weeks in the phase 3 study and open-label extension are indicated by 'a' and 'b' suffixes, respectively

Samples from the two studies were measured at different central laboratories, with different LLN values for 1,25 dihydroxyvitamin D (43 pmol/L in the phase 3 study [LLN<sup>1</sup>]; 48 pmol/L in the open-label extension [LLN<sup>2</sup>]) and TmP/GFR (0.81 and 0.80–1.00 mmol/L).

$p$  values are for the difference between the groups at week 0b (Fischer's exact test);  $p < 0.05$  was considered significant. There was no significant difference between the groups at study baseline.

For serum 1,25 dihydroxyvitamin D, 29% of the interim burosumab group but none of the no interim burosumab group had values  $\geq$  LLN at the start of the open-label extension period (not significant). For phosphate reabsorption (TmP/GFR), 83% of the interim burosumab group and 43% of the no interim burosumab group had values  $\geq$  LLN at the start of the open-label extension period (not significant).

BL, baseline; LLN, lower limit of normal range; TmP/GFR, ratio of tubular maximum reabsorption rate to glomerular filtration rate

**Supplementary Figure 5** Effect of burosomab treatment interruption on additional BPI-SF and WOMAC endpoints

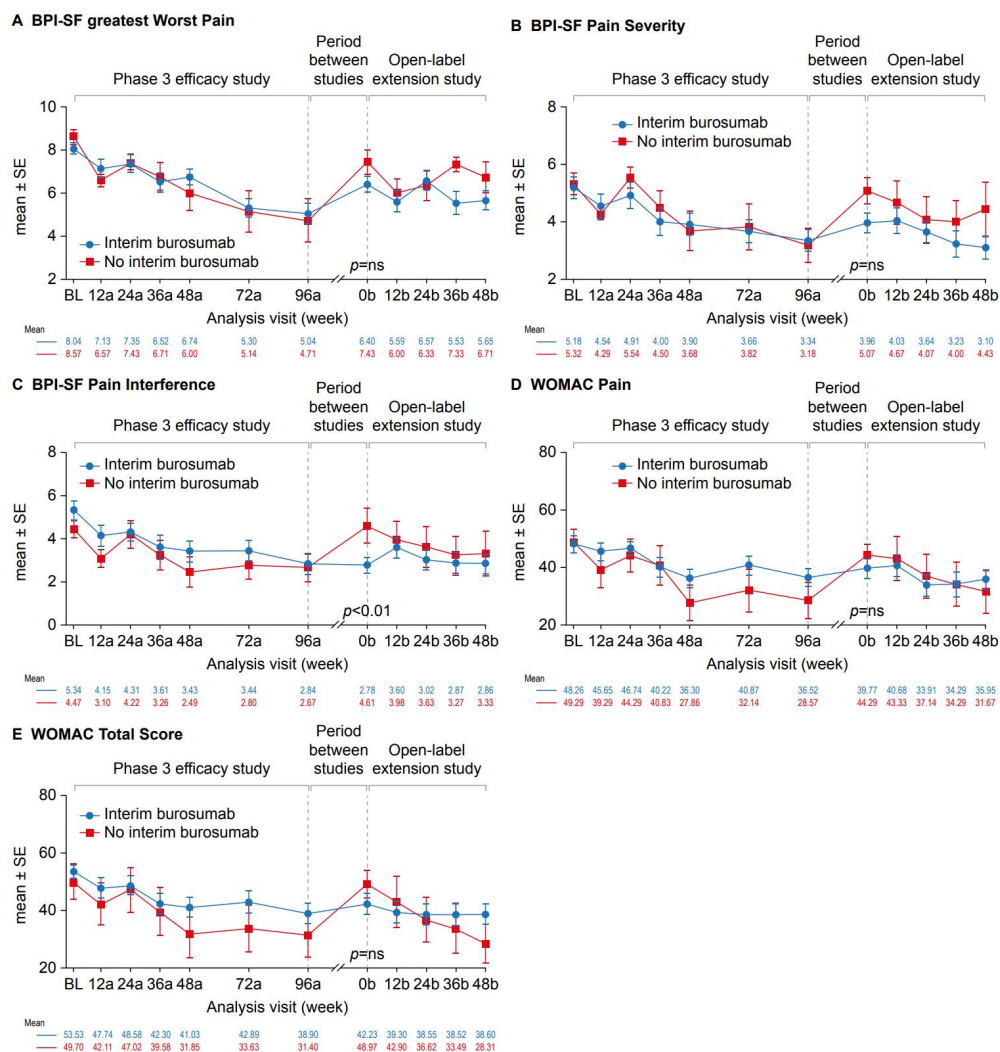

Interim burosomab, n=23; no interim burosomab, n=7  
 Analysis weeks in the phase 3 study and open-label extension are indicated by 'a' and 'b' suffixes, respectively  
 Decrease in WOMAC and BPI-SF scores indicates improvement  
 BPI-SF data were captured at a single site visit and were not completed as part of a patient diary at weeks 72a and 96a  
 p values are for the difference between the groups tested using the Mann-Whitney U test)  $p < 0.05$  was considered significant. There was no significant difference between the groups at study baseline.  
 BL, baseline; BPI-SF, Brief Pain Inventory short-form; SE, standard error; WOMAC, Western Ontario and McMaster Universities Osteoarthritis Index

**Supplementary Figure 6** Effect of burosuab treatment interruption on additional BFI endpoints

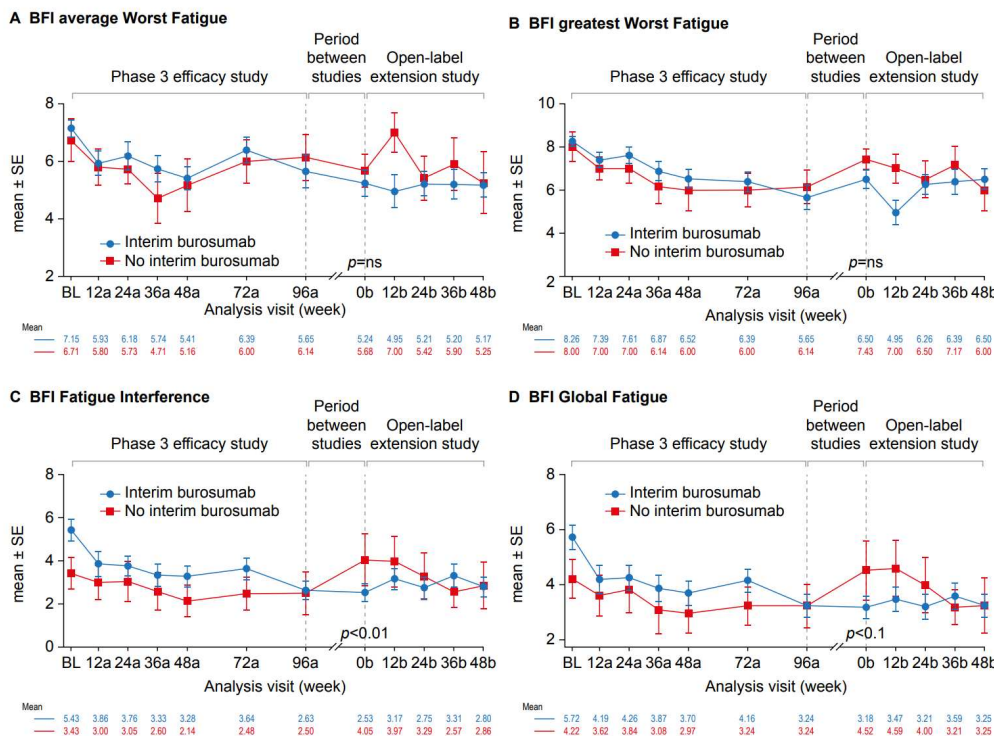

Interim burosuab, n=23; no interim burosuab, n=7

Analysis weeks in the phase 3 study and open-label extension are indicated by 'a' and 'b' suffixes, respectively

Decrease in BFI scores indicates improvement

BFI data were captured at a single site visit and were not completed as part of a patient diary at weeks 72a and 96a

p values are for the difference between the groups tested using the Mann–Whitney U test; p < 0.05 was considered significant. There was no significant difference between the groups at study baseline.

BFI, Brief Fatigue Inventory; BL, baseline; SE, standard error
